# Supplementary material
Source: PubMed Central journal article supplement (PMC8140978)
Supplement: 253_2021_11281_MOESM1_ESM.pdf [file 253_2021_11281_MOESM1_ESM.pdf]

*Applied Microbiology and Biotechnology*

Supplemental Information file

**Process Development and Scale-up Optimization of the SARS-CoV-2 Receptor Binding Domain-Based Vaccine Candidate, RBD219-N1C1**

Jungsoon Lee<sup>a,c\*</sup>, Zhuyun Liu<sup>a,c</sup>, Wen-Hsiang Chen<sup>a,c</sup>, Junfei Wei<sup>a,c</sup>, Rakhi Kundu<sup>a,c</sup>,  
Rakesh Adhikari<sup>a,c</sup>, Joanne Altieri Rivera<sup>a,c</sup>, Portia M. Gillespie<sup>a,c</sup>, Ulrich Strych<sup>a,c</sup>,  
Bin Zhan<sup>a,c</sup>, Peter J. Hotez<sup>a, b,c,d,e</sup>, Maria Elena Bottazzi<sup>a, b,c,d\*</sup>

<sup>a</sup> *National School of Tropical Medicine, Department of Pediatrics, Baylor College of Medicine, One Baylor Plaza, BCM113 Houston, TX, 77030, USA*

<sup>b</sup> *National School of Tropical Medicine, Department of Molecular Virology & Microbiology, Baylor College of Medicine, One Baylor Plaza, BCM113 Houston, TX, 77030, USA*

<sup>c</sup> *Texas Children's Hospital Center for Vaccine Development, Baylor College of Medicine, 1102 Bates Street, Houston TX, 77030, USA*

<sup>d</sup> *Department of Biology, College of Arts and Sciences, Baylor University, Waco TX, USA*

<sup>e</sup> *James A. Baker III Institute for Public Policy, Rice University, Houston TX, USA*

\*Correspondence to Maria Elena Bottazzi (Email: [bottazzi@bcm.edu](mailto:bottazzi@bcm.edu)) Tel. 832-824-0504 Fax 832-825-0549 and Jungsoon Lee (Email: [jslee@bcm.edu](mailto:jslee@bcm.edu)) Tel. 832-824-0504 Fax 832-825-0549

## Supplementary Fig. S1

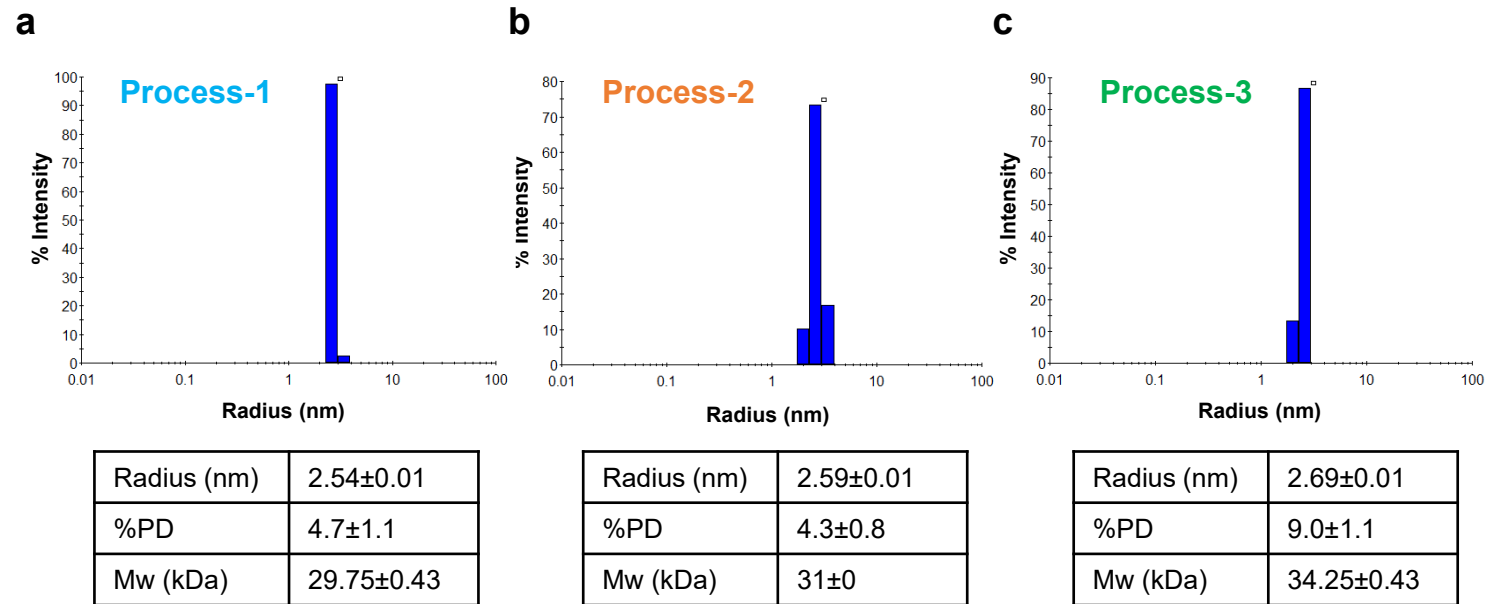

**Fig. S1.** Dynamic light scattering results of the purified proteins from Process-1 (A), Process-2 (B), and Process-3 (C). Measured Stokes radii, polydispersity (PD), and molecular weights (Mw) are shown as an average  $\pm$  SD from four independent measurements.
